# Supplementary figures and images for: Study on the physicochemical properties and immunomodulatory anti-tumor effect of thePholiota adiposapolysaccharide
Source: Royal Society of Chemistry journal article supplement (doi:10.1039/d1fo03628a), 2022-01-01

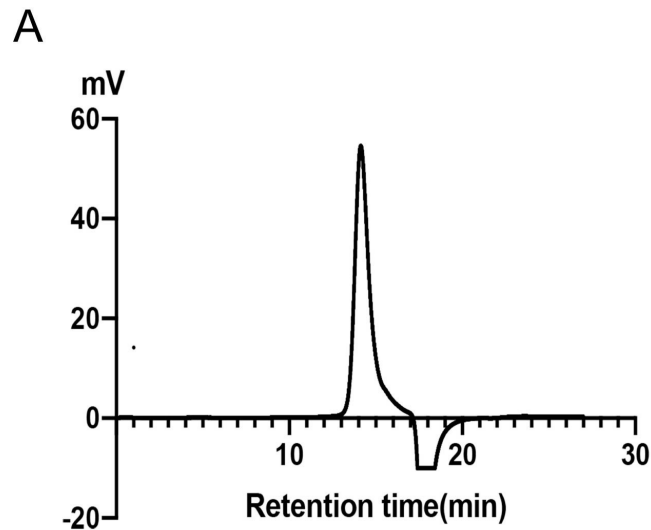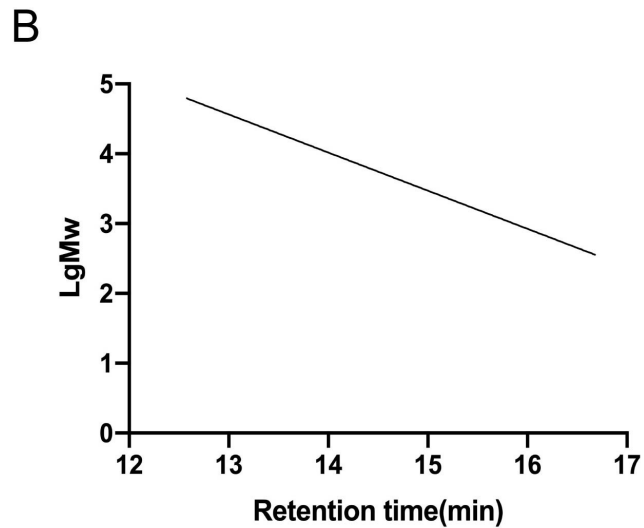

Supplement: d1fo03628a2.pdf [file d1fo03628a2.pdf]

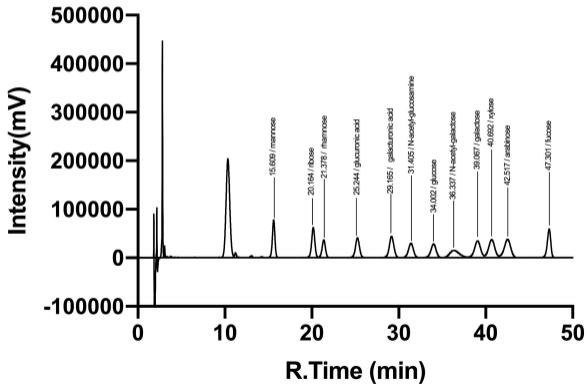

Supplement: d1fo03628a3.pdf [file d1fo03628a3.pdf]

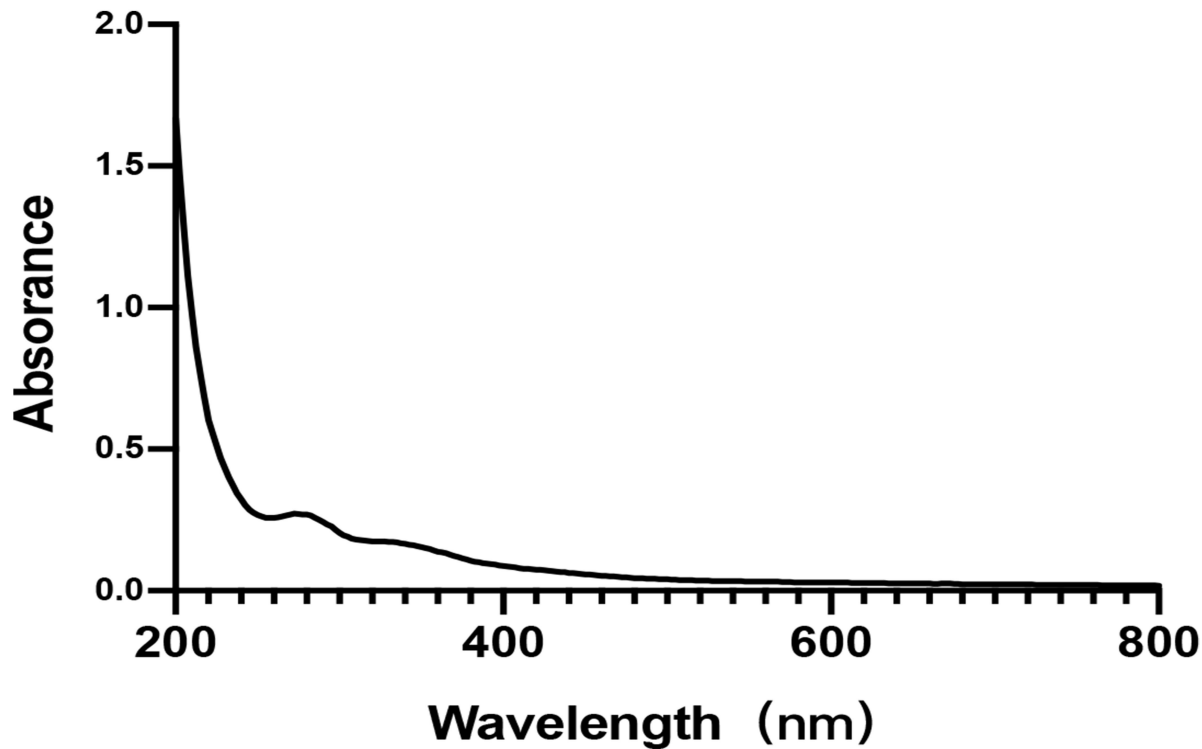

Supplement: d1fo03628a4.pdf [file d1fo03628a4.pdf]

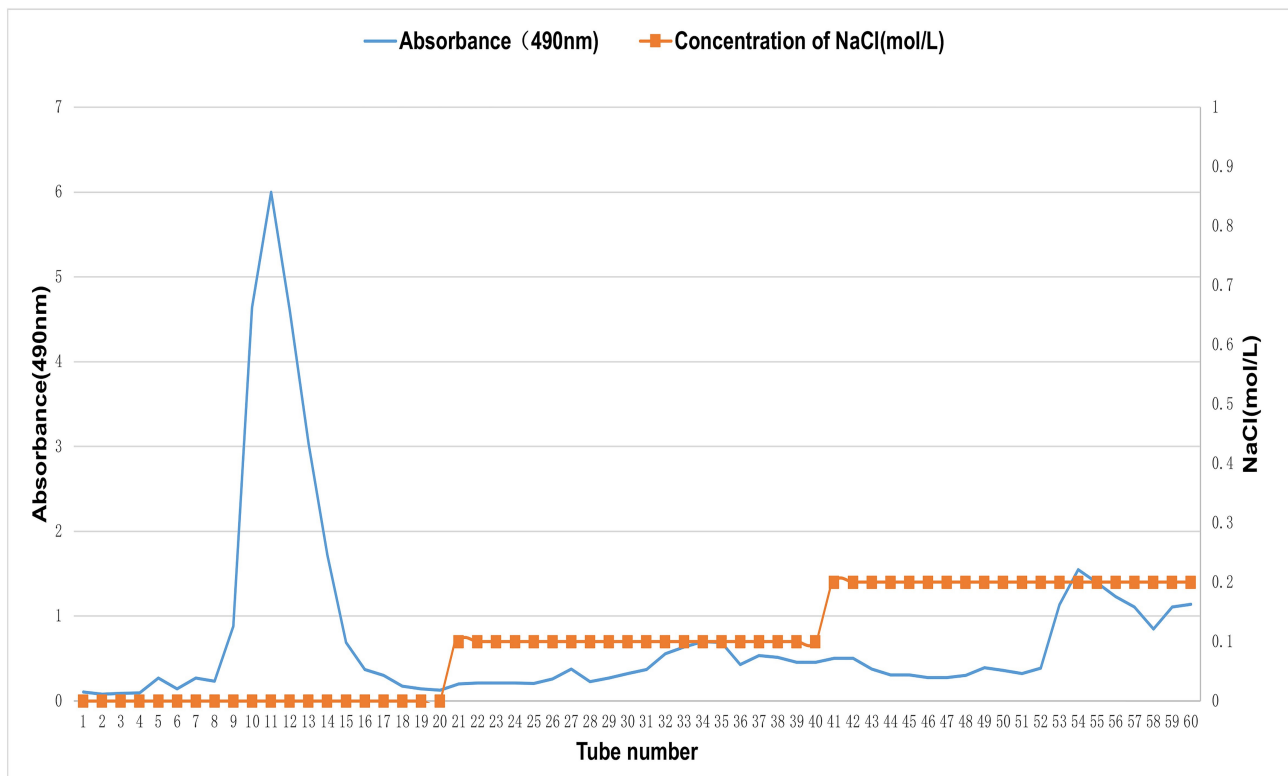

Supplement: d1fo03628a5.pdf [file d1fo03628a5.pdf]

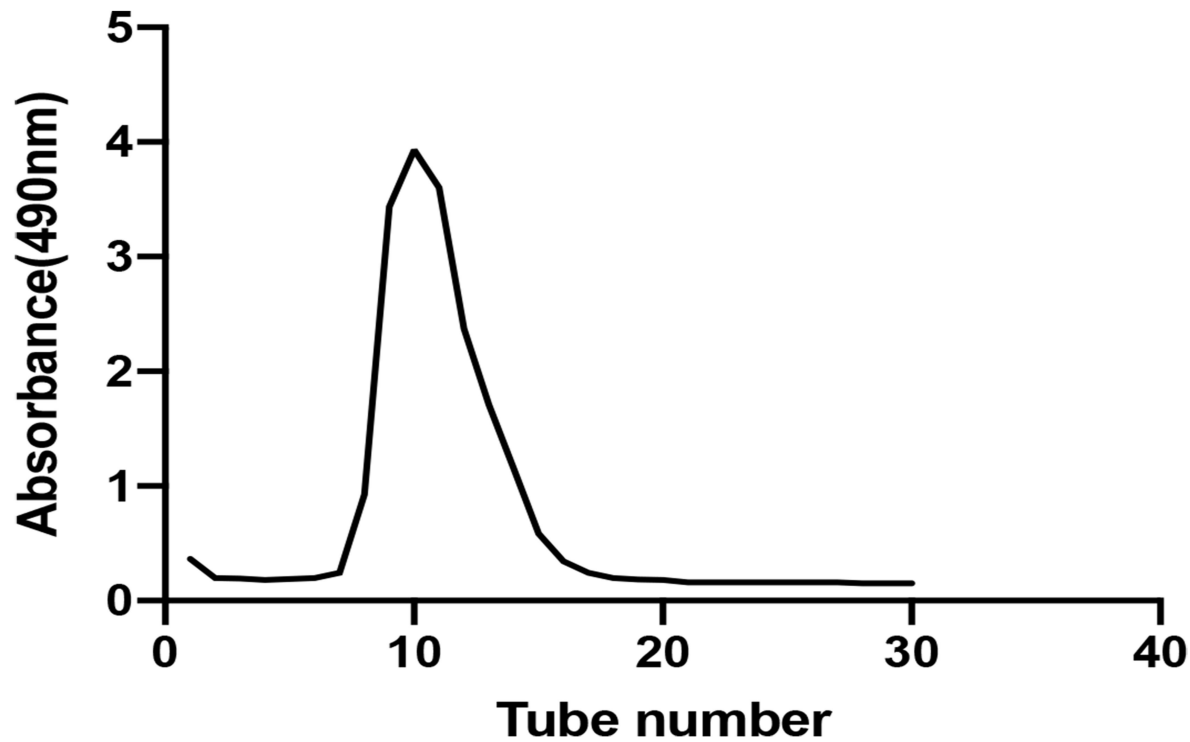

Supplement: d1fo03628a6.pdf [file d1fo03628a6.pdf]
